# Supplementary material
Source: PubMed Central journal article supplement (PMC4134881)
Supplement: NIHMS604555-supplement-Supplemental_Tables_and_References.pdf [file NIHMS604555-supplement-Supplemental_Tables_and_References.pdf]

**SUPPLEMENTAL MATERIAL**  
**SUPPLEMENTAL TABLES**

**Table I. BP Lowering Trials for Recurrent Stroke Prevention**

| Trial                                       | Subjects<br>(Centers) | Age, y/<br>Female, % | Qualifying<br>Event, %                     | Median<br>Enroll<br>Months | Mean<br>Follow-up<br>Years | Treatment Drug<br>(daily dose);<br>Control                   | Baseline BP,<br>mm Hg<br>(% HTN)  | BP<br>Reduction,<br>mm Hg                   | Treatment v. Control<br>Recurrent Event;<br>Risk Reduction*<br>(95% CI) |
|---------------------------------------------|-----------------------|----------------------|--------------------------------------------|----------------------------|----------------------------|--------------------------------------------------------------|-----------------------------------|---------------------------------------------|-------------------------------------------------------------------------|
| PATS 1995 <sup>1</sup>                      | 5,665<br>(44)         | 60/ 28               | IS: 71;<br>TIA: 12;<br>HS: 16              | 14                         | 2                          | Indapamide (2.5mg);<br>placebo                               | 154/93 (84)                       | 5/2                                         | 9.4% v. 12.3%;<br>RR 29% (12-42)                                        |
| PROGRESS 2001 <sup>2</sup><br>(Single-drug) | 2,561<br>(172)        | 65/ 32               | IS: 70;<br>TIA: 23;<br>ICH: 11             | 9                          | 3.9                        | Perindopril (4mg);<br>placebo                                | 144/84 (40)                       | 5/3                                         | 12.3% v. 12.9%;<br>RR 5% (-19-23)                                       |
| PROGRESS 2001 <sup>2</sup><br>(Combination) | 3,544<br>(172)        | 63/ 29               | IS: 71;<br>TIA: 22;<br>ICH: 11             | 7                          | 3.9                        | Perindopril (4mg) +<br>Indapamide (2.5mg);<br>double-placebo | 149/87 (54)                       | 12/5                                        | 8.5% v. 14.4%;<br>RR 43% (30-54)                                        |
| MOSES 2005 <sup>3</sup>                     | 1,405<br>(330)        | 68/ 46               | IS: 61;<br>TIA: 27;<br>PRIND: 6;<br>ICH: 6 | 12                         | 2.5                        | Eprosartan (600mg);<br>Nitrendipine (10mg)                   | 151/87 (100)<br>in both<br>groups | 13/3<br>Eprosartan;<br>16/7<br>Nitrendipine | 6.6 ID Eprosartan v.<br>8.8 ID Nitrendipine;<br>RR 25% (3-42)           |
| PRoFESS 2008 <sup>4</sup>                   | 20,332<br>(695)       | 66/ 36               | IS: 100                                    | 0.5                        | 2.5                        | Telmisartan (80mg);<br>placebo                               | 144/84 (74)                       | 3.8/2.0                                     | 8.7% v. 9.2%<br>RR 5% (-4-14)                                           |

IS, ischemic stroke; TIA, transient ischemic attack; HS, hemorrhagic stroke; ICH, intracerebral hemorrhage; PRIND, prolonged reversible ischemic neurological disorder; BP, blood pressure, given as systolic/diastolic; HTN, prior hypertension, RR, risk reductions; ID, incidence density per 100 person-years; CI, confidence interval.

\* Recurrent stroke relative risk reduction estimates for treatment versus placebo were based on proportional hazards regression for all studies except for MOSES where risk reduction was estimated from the incidence density ratio (ID ratio: 0.75 (0.58-0.97)) between two treatment groups.

**Table II. ASA/AHA Guideline Recommendations for BP Management for Recurrent Stroke Prevention**

---

*Ischemic Stroke and Transient Ischemic Attack*<sup>5</sup>

1. Initiation of BP therapy is indicated for previously untreated patients with ischemic stroke or TIA who, after the first several days, have an established BP  $\geq 140$  mm Hg systolic or  $\geq 90$  diastolic (*Class I; LOV B*). Initiation of therapy for patients with BP  $< 140$  mm Hg systolic and  $< 90$  mm Hg diastolic is of uncertain benefit (*Class IIb; LOV C*).\*
2. Resumption of BP therapy is indicated for previously treated patients with known hypertension for both prevention of recurrent stroke and prevention of other vascular events in those who have had an ischemic stroke or TIA and are beyond the first several days (*Class I; LOV A*).\*
3. Goals for target BP level or reduction from pretreatment baseline are uncertain and should be individualized, but it is reasonable to achieve a systolic pressure  $< 140$  mm Hg and a diastolic pressure  $< 90$  mm Hg (*Class IIa; LOV B*). For patients with a recent lacunar stroke, it might be reasonable to target an SBP  $< 130$  mm Hg (*Class IIb; LOV B*).\*
4. Several lifestyle modifications have been associated with BP reduction and are a reasonable part of a comprehensive antihypertensive therapy. These modifications include salt restriction; weight loss; consumption of a diet rich in fruits, vegetables, and low-fat dairy products; regular aerobic physical activity; and limited alcohol consumption. (*Class IIa; LOV C*)
5. The optimal drug regimen to achieve the recommended level of reductions is uncertain because direct comparisons between regimens are limited. The available data indicate that diuretics or the combination of diuretics and an ACEI is useful. (*Class I; LOV A*)
6. The choice of specific drugs and targets should be individualized on the basis of pharmacological properties, mechanism of action, and consideration of specific patient characteristics for which specific agents are probably indicated (eg, extracranial cerebrovascular occlusive disease, renal impairment, cardiac disease, and diabetes). (*Class IIa; LOV B*)

*Intracerebral Hemorrhage*<sup>6</sup>

1. After the acute ICH period, absent medical contraindications, BP should be well controlled, particularly for patients with ICH location typical of hypertensive vasculopathy. (*Class I; LOV A*)\*
2. After the acute ICH period, a goal target of a normal BP of  $< 140/90$  ( $< 130/80$  if diabetes or chronic kidney disease) is reasonable. (*Class IIa; LOV B*)\*

---

Class, class of recommendation; LOV, level of evidence; BP, blood pressure, given as systolic/diastolic mm Hg; TIA, transient ischemic attack; ICH, intracerebral hemorrhage; ACEI, angiotensin-converting enzyme inhibitor.

\* New or revised recommendation from previously published guidelines

## SUPPLEMENTAL REFERENCES

1. Pats Collaborating Group. Post-stroke antihypertensive treatment study. A preliminary result. *Chin Med J (Engl)*. 1995;108:710-717.
2. PROGRESS Collaborative Group. Randomised trial of a perindopril-based blood-pressure-lowering regimen among 6,105 individuals with previous stroke or transient ischaemic attack. *Lancet*. 2001;358:1033-1041.
3. Schrader J, Luders S, Kulschewski A, Hammersen F, Plate K, Berger J, et al. Morbidity and Mortality After Stroke, Eprosartan Compared with Nitrendipine for Secondary Prevention: principal results of a prospective randomized controlled study (MOSES). *Stroke*. 2005;36:1218-1226.
4. Yusuf S, Diener HC, Sacco RL, Cotton D, Ounpuu S, Lawton WA, et al. Telmisartan to prevent recurrent stroke and cardiovascular events. *N Engl J Med*. 2008;359:1225-1237.
5. Kernan WN, Ovbiagele B, Black HR, Bravata DM, Chimowitz MI, Ezekowitz MD, et al. Guidelines for the Prevention of Stroke in Patients With Stroke and Transient Ischemic Attack: A Guideline for Healthcare Professionals From the American Heart Association/American Stroke Association. [May 1, 2014]. *Stroke*. 2014. <http://stroke.ahajournals.org/content/early/2014/04/30/STR.0000000000000024>. Accessed May 1, 2014.
6. Morgenstern LB, Hemphill JC, 3rd, Anderson C, Becker K, Broderick JP, Connolly ES, Jr., et al. Guidelines for the management of spontaneous intracerebral hemorrhage: a guideline for healthcare professionals from the American Heart Association/American Stroke Association. *Stroke*. 2010;41:2108-2129.
